# Supplementary material for: Phenolic Compounds and Antioxidant Capacity Comparison of Wild-Type and Yellow-Leaf gl1 Mutant of Lagerstroemia indica
Source: MDPI journal article supplement (doi:10.3390/plants13020315), 2024-01-20
Supplement: s1 [file s1]

**Table S1.** The phenylpropanoid metabolism proteins with significant differentially down-regulated expression in the mutant *gII* compared with WT.

| Protein name | Describe                                                | Accession No.  | Unique Peptides | Mol. Weight [kDa] | log <sub>2</sub> ( <i>gII</i> /WT) |
|--------------|---------------------------------------------------------|----------------|-----------------|-------------------|------------------------------------|
| Dirigent     | dirigent-like protein                                   | PKI48616.1     | 6               | 21.36             | -7.43                              |
| POD          | peroxidase [EC:1.11.1.7]                                | OWM81649.1     | 8               | 32.92             | -6.53                              |
| POD          | peroxidase [EC:1.11.1.7]                                | XP_010031113.1 | 5               | 37.11             | -4.56                              |
| POD          | peroxidase [EC:1.11.1.7]                                | PKI44004.1     | 5               | 33.81             | -4.29                              |
| POD          | peroxidase [EC:1.11.1.7]                                | PKI72026.1     | 8               | 39.85             | -1.81                              |
| POD          | peroxidase [EC:1.11.1.7]                                | OWM83503.1     | 11              | 41.62             | -1.67                              |
| POD          | peroxidase [EC:1.11.1.7]                                | PKI72026.1     | 4               | 26.55             | -1.32                              |
| COMT         | caffeic acid 3-O-methyltransferase [EC:2.1.1.68]        | XP_023919597.1 | 4               | 41.86             | -5.16                              |
| COMT         | caffeic acid 3-O-methyltransferase [EC:2.1.1.68]        | AID68566.1     | 4               | 43.32             | -1.43                              |
| CAD          | cinnamyl alcohol dehydrogenase [EC:1.1.1.195]           | OMO73994.1     | 3               | 39.02             | -4.59                              |
| CAD          | cinnamyl alcohol dehydrogenase [EC:1.1.1.195]           | XP_018827699.1 | 2               | 39.01             | -3.10                              |
| CAD          | cinnamyl alcohol dehydrogenase [EC:1.1.1.195]           | OWM64820.1     | 2               | 27.667            | -1.93                              |
| CAD          | cinnamyl alcohol dehydrogenase [EC:1.1.1.195]           | PKI61458.1     | 2               | 38.67             | -1.76                              |
| 4-CL         | 4-coumarate:CoA ligase [EC:6.2.1.12]                    | PKI52297.1     | 3               | 38.20             | -3.57                              |
| 4-CL         | 4-coumarate:CoA ligase [EC:6.2.1.12]                    | OWM65790.1     | 2               | 23.36             | -3.08                              |
| CCoAOMT      | caffeoyl-CoA O-methyltransferase [EC:2.1.1.104]         | XP_015869695.1 | 7               | 27.87             | -2.57                              |
| HCT          | shikimate O-hydroxycinnamoyl transferase [EC:2.3.1.133] | XP_010034043.2 | 2               | 43.75             | -1.13                              |

Table S2. The list of 193 differential metabolites including 84 up-regulated and 109 down-regulated ( $p < 0.05$  and  $FC > 2$  or  $FC < -2$ ).

Please see the Supplementary File in EXCEL

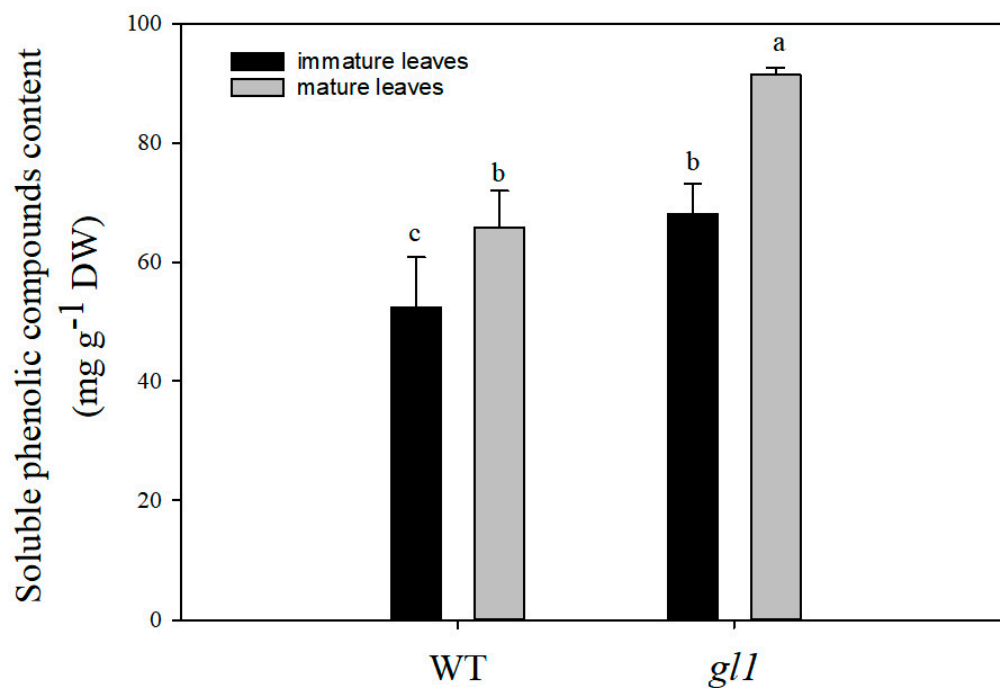

**Figure S1.** The contents of soluble phenolic compounds in the immature and mature leaves of the mutant *gl1* and WT. The vertical bars are presented as mean  $\pm$  SD,  $n = 3$ . The different letters indicate significant differences at  $p < 0.05$  level between WT and *gl1* mutant.

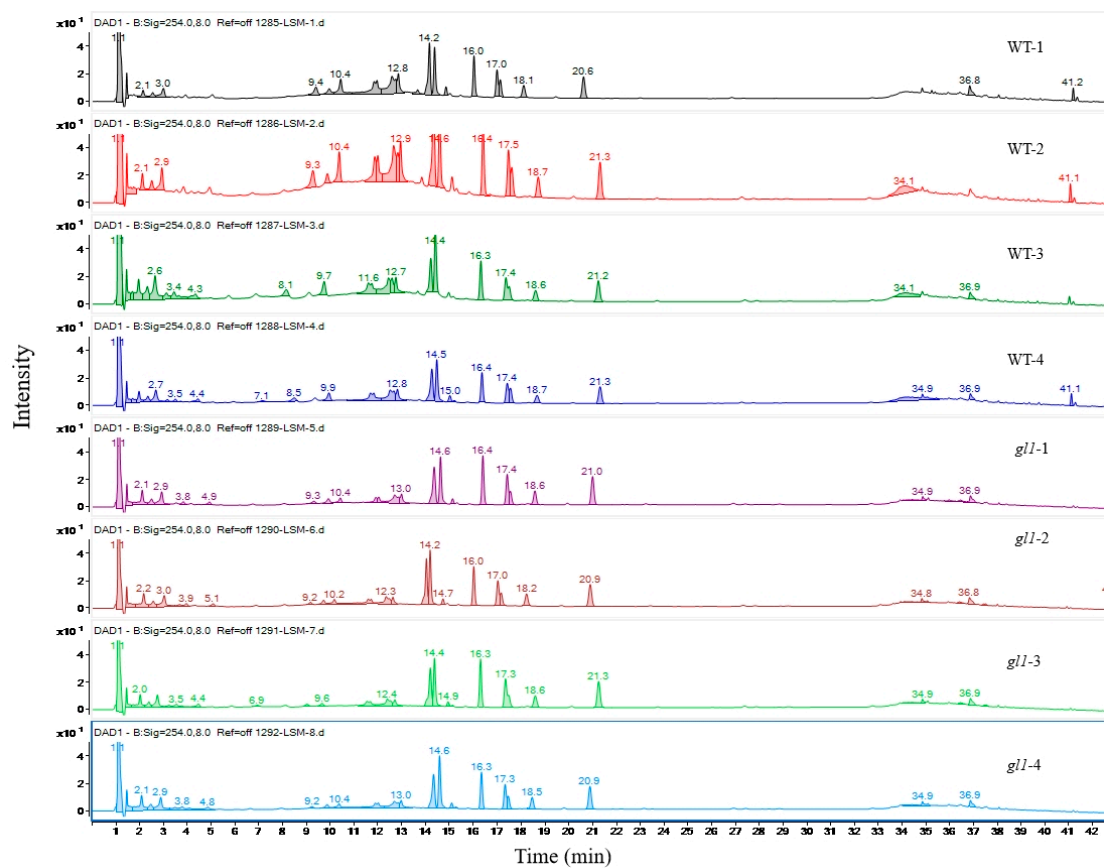

**Figure S2.** The total ion chromatogram of metabolites extract in WT and the *glI* mutant.
